# Supplementary material for: Hydrophilic Porous Polydimethysiloxane Sponge as a Novel 3D Matrix Mimicking Heterogeneous Pores in Soil for Plant Cultivation
Source: MDPI journal article supplement (doi:10.3390/polym12010140), 2020-01-06
Supplement: s1 [file s1]

Supplementary information

## Hydrophilic porous polydimethylsiloxane sponge as a novel 3D matrix mimicking heterogeneous pores in soil for plant cultivation

Feng Chen<sup>1</sup>, Hui Hui Chai<sup>1</sup>, Zhao Xi Song<sup>1</sup>, Ling Yu<sup>1\*</sup>, and Can Fang<sup>2\*</sup>

<sup>1</sup> Key Laboratory of Luminescent and Real-Time Analytical Chemistry (Southwest University), Ministry of Education, Institute for Clean Energy and Advanced Materials, Faculty of Materials and Energy, Southwest University, Chongqing 400715, PR China; <sup>2</sup> School of Computer Science and Software Engineering, Southwest University,

\* Correspondence: canfang@swu.edu.cn (C. F); lingyu12@swu.edu.cn (L.Y.) Tel.: +86-23-68254842

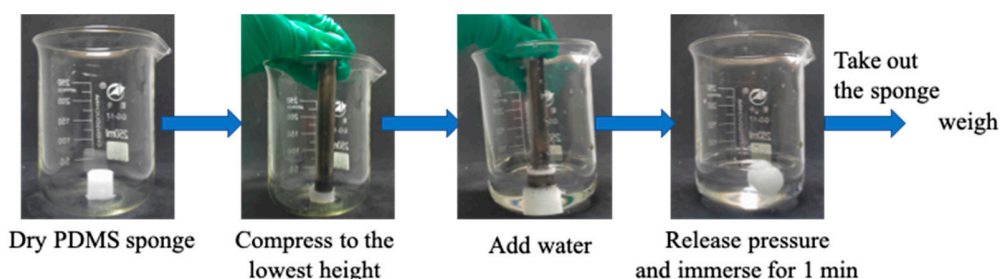

Figure S1. Compress-release induced water-intaking by PDMS sponge. A dry PDMS sponge is placed in a beaker. The sponge was compressed to its thinnest form. Water was added and immersed the compressed sponge. Release the sponge and keep it in water for 1 min. The passive absorption induced weight change was calculated as  $[(M_{\text{wet}} - M_{\text{dry}})/M_{\text{dry}}] \times 100\%$ , where  $M_{\text{wet}}$  and  $M_{\text{dry}}$  are weight of water-intaking wet sponge and dry sponge, respectively.

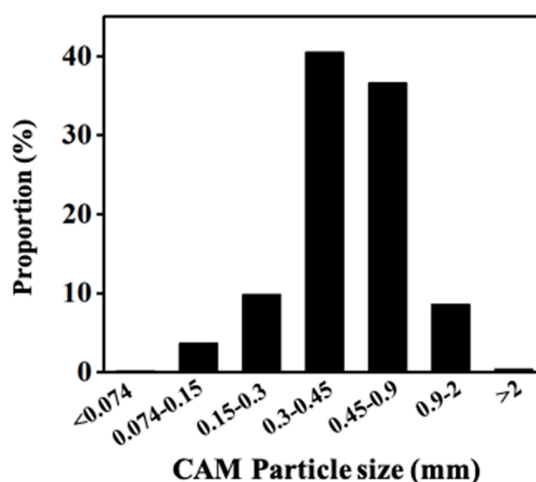

Figure S2. Particle size of citric acid monohydrate (CAM) characterized by sieving. 10 g CAM was analyzed by a sieve method [1].

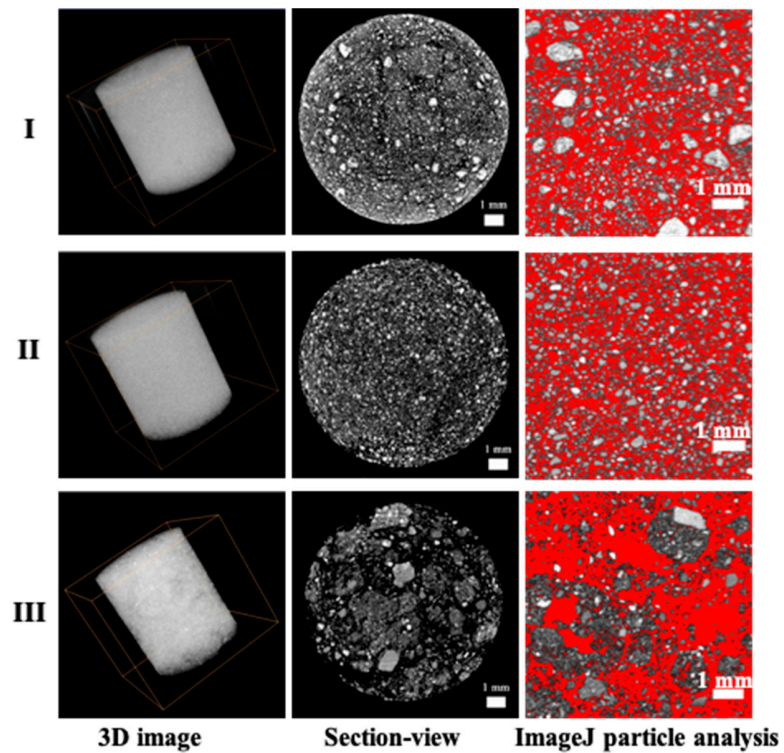

Figure S3. micro-CT characterization of soil specimens.

## References

1. Dishman, K.; Doolin, P.; Hoffman, J. Comparison of particle size of cracking catalyst determined by laser light scattering and dry sieve methods. *Ind Eng Chem Res.* **1993**, *32*(7), 1457-1463.
